# Supplementary material for: Generation of beta-lactoglobulin knock-out goats using CRISPR/Cas9
Source: PubMed Central journal article supplement (PMC5634636; doi:10.1371/journal.pone.0186056), 2017-10-10
Supplement: pone.0186056.s005.pdf [file pone.0186056.s005.pdf]

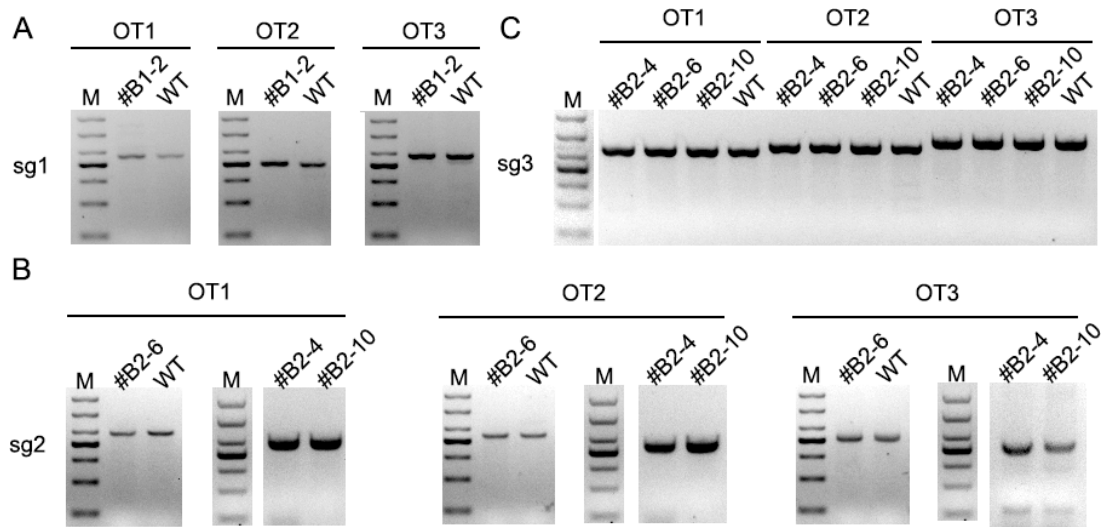

**S5 Fig. Off-target assay of targeted goats at 9 OTs. (A)** T7E1 cleavage assay of 3 potential OTs of sg1 **(B)** T7E1 cleavage assay of 3 potential OTs of sg2 **(C)** T7E1 cleavage assay of 3 potential OTs of sg3
