# Supplementary material for: Generation of beta-lactoglobulin knock-out goats using CRISPR/Cas9
Source: PubMed Central journal article supplement (PMC5634636; doi:10.1371/journal.pone.0186056), 2017-10-10
Supplement: pone.0186056.s006.pdf [file pone.0186056.s006.pdf]

**S1 Table. Details of gRNAs for goat.**

| sgRNA | Gene target | Target site sequence (5'→3') |
|-------|-------------|------------------------------|
| sg1   |             | GGCCCTCGCCTGTGGCATCCAGG      |
| sg2   | BLG Exon1   | GGATGCCACAGGCGAGGGCCAGG      |
| sg3   |             | ATCGTCACCCAGACCATGAAAGG      |
