# Supplementary material for: Generation of beta-lactoglobulin knock-out goats using CRISPR/Cas9
Source: PLOS journal article supplement (doi:10.1371/journal.pone.0186056), 2017-10-10
Supplement: S4 (10.1371/journal.pone.0186056.s004) [file journal.pone.0186056.s004]

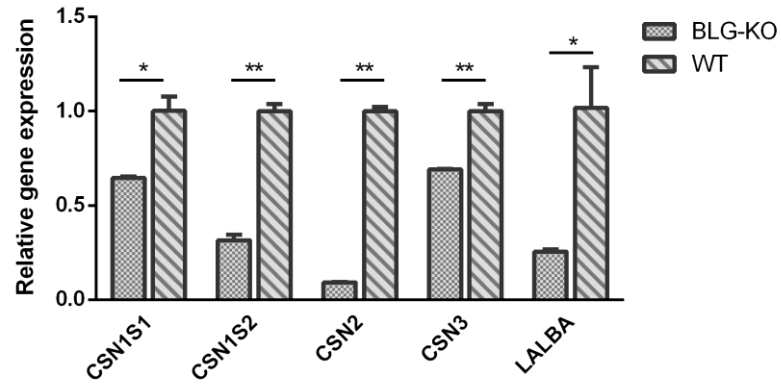

**S4 Fig. Milk protein coding gene expression in goat mammary gland.** Relative expression of major milk genes except *BLG*. Values with one asterisk ( $p < 0.05$ ) or two asterisks ( $p < 0.01$ ) are significantly different. Three assay replicates were performed for each tissue sample. BLG-KO, #B1-2. WT, wildtype goats. *CSN1S1*, *CSN1S2*, *CSN2*, *CSN3*, and *LALBA* are symbols of *alpha-S1-casein*, *alpha-S2-casein*, *beta-casein*, *kappa-casein*, and *lactalbumin* respectively.
